# Supplementary material for: Development of a cellulose acetate-based polymeric membrane for the extraction and quantification of fluoxetine and norepinephrine in biological samples
Source: Royal Society of Chemistry journal article supplement (doi:10.1039/d5ay01724f), 2025-12-15
Supplement: d5ay01724f1.pdf [file d5ay01724f1.pdf]

**Development of a Cellulose Acetate-Based Polymeric Membrane for the Extraction and  
Quantification of Fluoxetine and Norepinephrine in Biological Samples**

Seyedeh Susan Sayyedi <sup>a</sup>, Tahere Khezeli\*<sup>a</sup>, Ali Daneshfar <sup>b</sup>

<sup>a</sup> *Department of Chemistry, Faculty of Science, Ilam University, Ilam, 69315-516, Iran, E-mail:*

*t.khezeli@ilam.ac.ir.*

<sup>b</sup> *Department of Chemistry, Lorestan University, Khoramabad, Iran*

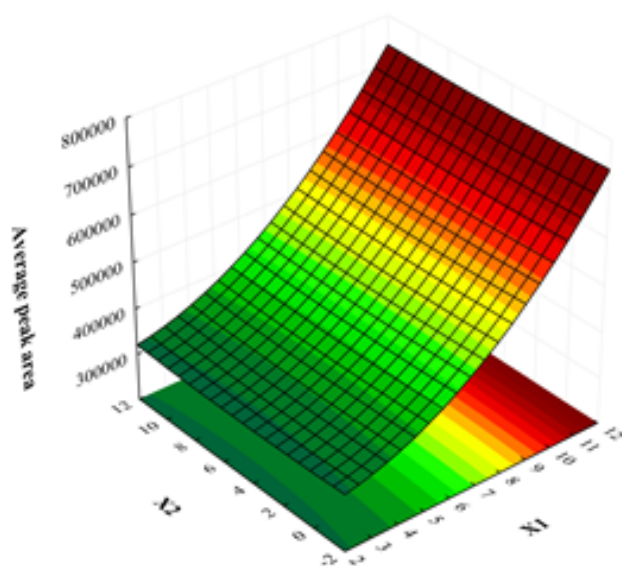

**Fig. S1.** Three dimension plots of CCD.

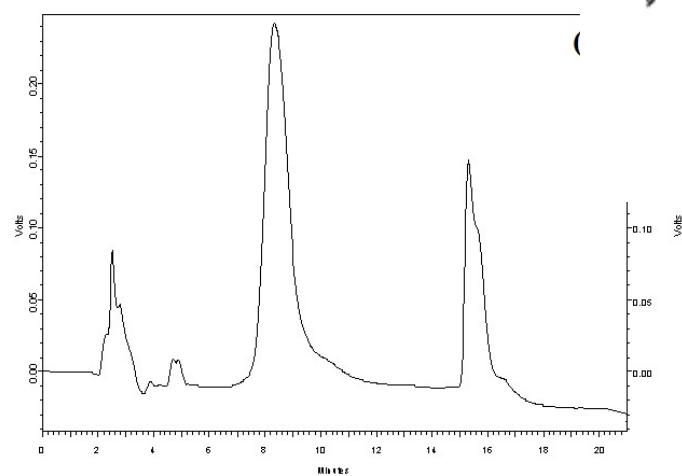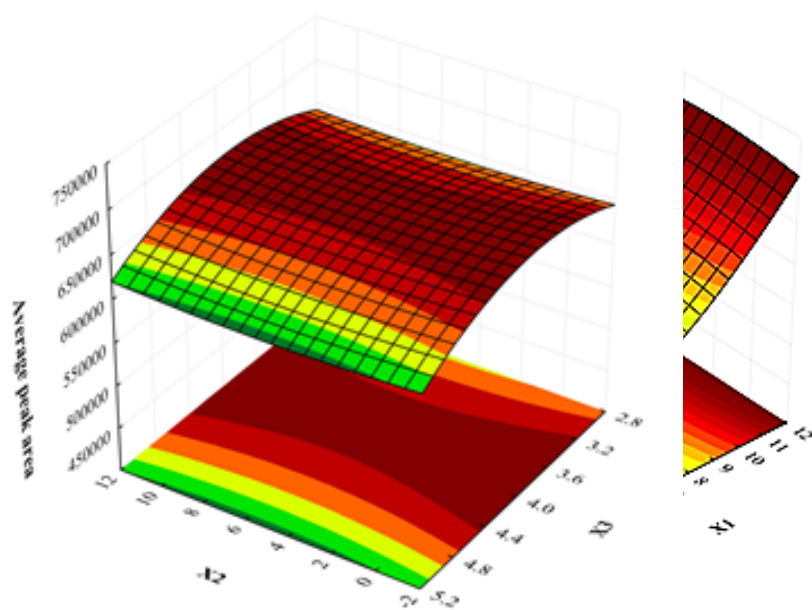

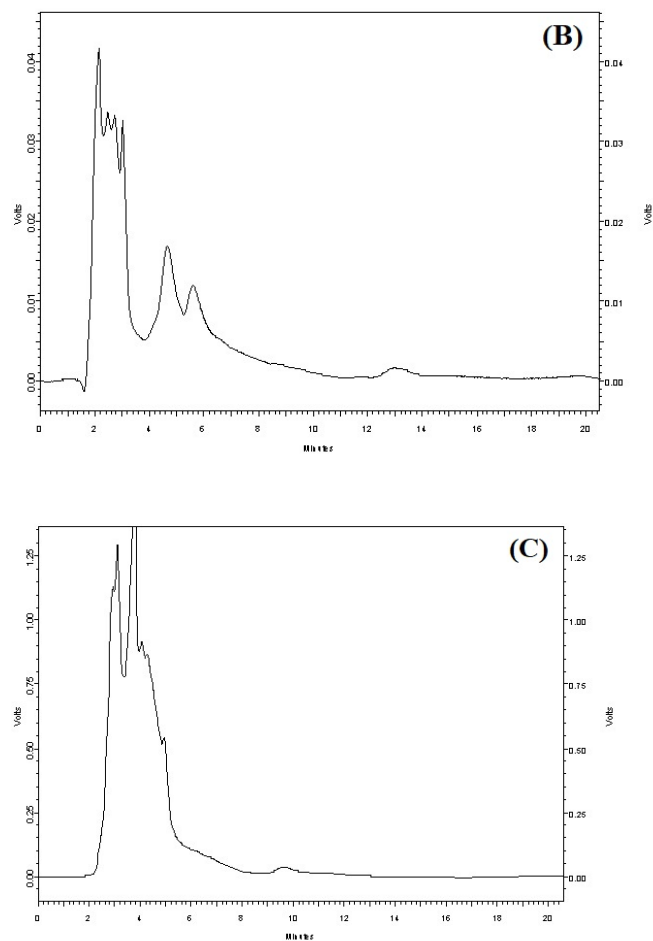

**Fig. S2.** Chromatograms of NE (retention time NE: 8.3 min; retention time FL: 15.2 min) and FL standard solution (A), urine without spike analytes (b), and serum without spike

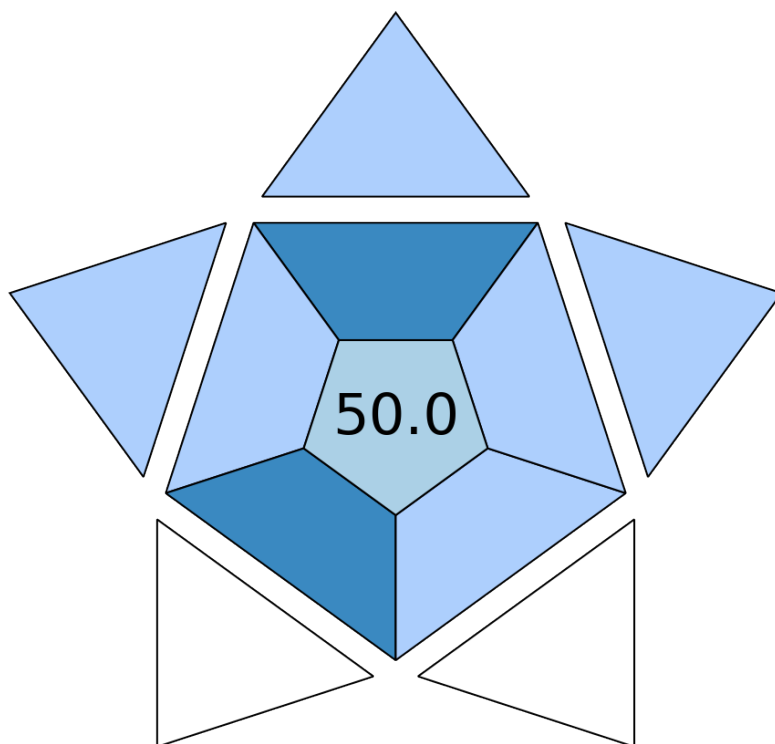

**Fig. S3.** Pictogram of BAGI analysis.
